# Supplementary material
Source: PubMed Central journal article supplement (PMC7247045)
Supplement: Supp_Figs1-2.pdf [file Supp_Figs1-2.pdf]

```

SP|O35409|FOLH1_MOUSE      KNWKTNKVSSYPLYHSVYETIELVVKFYDPTFKYHLTVAQVRGAMVFELANSIVLPFDCQ 600
SP|P70627|FOLH1_RAT       KNWKNKVVSSYPLYHSVYETIELVEKFYDPTFKYHLTVAQVRGAMVFELANSIVLPFDCQ 600
TR|F7FA05|F7FA05_MACMU   KNWETNKFSSYPLYHSVYETIELVEKFYDPTFKYHLTVAQVRGGMVFELANSVLPFDCR 598
TR|A0A2K5VNZ0|A0A2K5VNZ0_MACFA KNWETNKFSSYPLYHSVYETIELVEKFYDPTFKYHLTVAQVRGGMVFELANSVLPFDCR 598
                               ***:.*.*.*.***** ***** *****.*.*****:*****:

SP|Q04609|FOLH1_HUMAN     DYAVVLRKYADKIYISMKHPQEMKTYSVSFDSLFSAVKNFTEIASKFSERLQDFDKSNP 658
SP|O35409|FOLH1_MOUSE     SYAVALKKYADTIYINISMKHPQEMKAYMISFDSLFSAVNNFTDVASKFNQRLQELDKSNP 660
SP|P70627|FOLH1_RAT       SYAVALKKHAETIYINISMNHPQEMKAYMISFDSLFSAVNNFTDVASKFNQRLQELDKSNP 660
TR|F7FA05|F7FA05_MACMU   DYAVVLRKYADKIYINISMKHPQEMKTYSVSFDSLFSAVKNFTEIASKFSERLRDFDKSNP 658
TR|A0A2K5VNZ0|A0A2K5VNZ0_MACFA DYAVVLRKYADKIYINISMKHPQEMKTYSVSFDSLFSAVKNFTEIASKFSERLRDFDKSNP 658
                               .***.*.*.*:.*.*.*****:* :*****.*.*:***.*.*:*****

SP|Q04609|FOLH1_HUMAN     ILLRMMNDQLMFLERAFIDPLGLPDRPFYRHVIYAPSSHNKYAGESFPGIYDALFDIESK 718
SP|O35409|FOLH1_MOUSE     ILLRIMNDQLMYLERAFIDPLGLPGRPFYRHVIYAPSSHNKYAGESFPGIYDALFDISSK 720
SP|P70627|FOLH1_RAT       ILLRILNDQLMYLERAFIDPLGLPGRPFYRHVIYAPSSHNKYAGESFPGIYDALFDINN 720
TR|F7FA05|F7FA05_MACMU   ILLRMMNDQLMFLERAFIDPLGLPDRPFYRHVIYAPSSHNKYAGESFPGIYDALFDIESK 718
TR|A0A2K5VNZ0|A0A2K5VNZ0_MACFA ILLRMMNDQLMFLERAFIDPLGLPDRPFYRHVIYAPSSHNKYAGESFPGIYDALFDIESK 718
                               *:***:*****:*****.*.*****:*****:*****:*****.*

SP|Q04609|FOLH1_HUMAN     VDPSKAWGEVVKRQIYVAAFTVQAAAETLSEVA 750
SP|O35409|FOLH1_MOUSE     VNASKAWNEVKRQISIAFTTVQAAAETLREVA 752
SP|P70627|FOLH1_RAT       VDTSKAWREVKRQISIAFTTVQAAAETLREVD 752
TR|F7FA05|F7FA05_MACMU   VDPSQAWGEVVKRQISIAFTTVQAAAETLSEVA 750
TR|A0A2K5VNZ0|A0A2K5VNZ0_MACFA VDPSQAWGEVVKRQISIAFTTVQAAAETLSEVA 750
                               *:*** ***** :*:***** **

```

**B** Protein sequence conservation across tested species.

| Species                             | Protein Sequence Identity |
|-------------------------------------|---------------------------|
| mouse                               | 83.4%                     |
| rat                                 | 87.4%                     |
| rhesus macaque                      | 93.0%                     |
| crab-eating macaque                 | 97.5%                     |
| Conserved identity across orthologs | 81.1%                     |

**SUPPLEMENTARY FIG. S1.** (Continued).

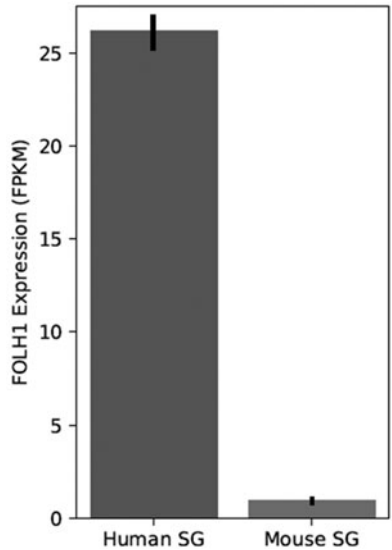

**SUPPLEMENTARY FIG. S2.** Expression in FPKM of PSMA (*FOLH1*) in salivary gland (SG) for both human and mouse was plotted. *FOLH1* is expressed at low levels in the mouse salivary gland, compared with moderate expression of FOHL1 in the human salivary gland (Error bars represent mean  $\pm$  SD;  $n=2$  for human and  $n=3$  for mice).
